# Supplementary material for: Temperature dependent evolution of wrinkled single-crystal silicon ribbons on shape memory polymers
Source: Royal Society of Chemistry journal article supplement (doi:10.1039/c7sm01404j), 2017-01-01

## Supporting Information

**Title** Temperature dependent evolution of wrinkled single-crystal silicon ribbons on shape memory polymer

*Yu Wang, Kai Yu, H. Jerry Qi, and Jianliang Xiao\**

Figure S1 A representative shape memory cycle of SMP.

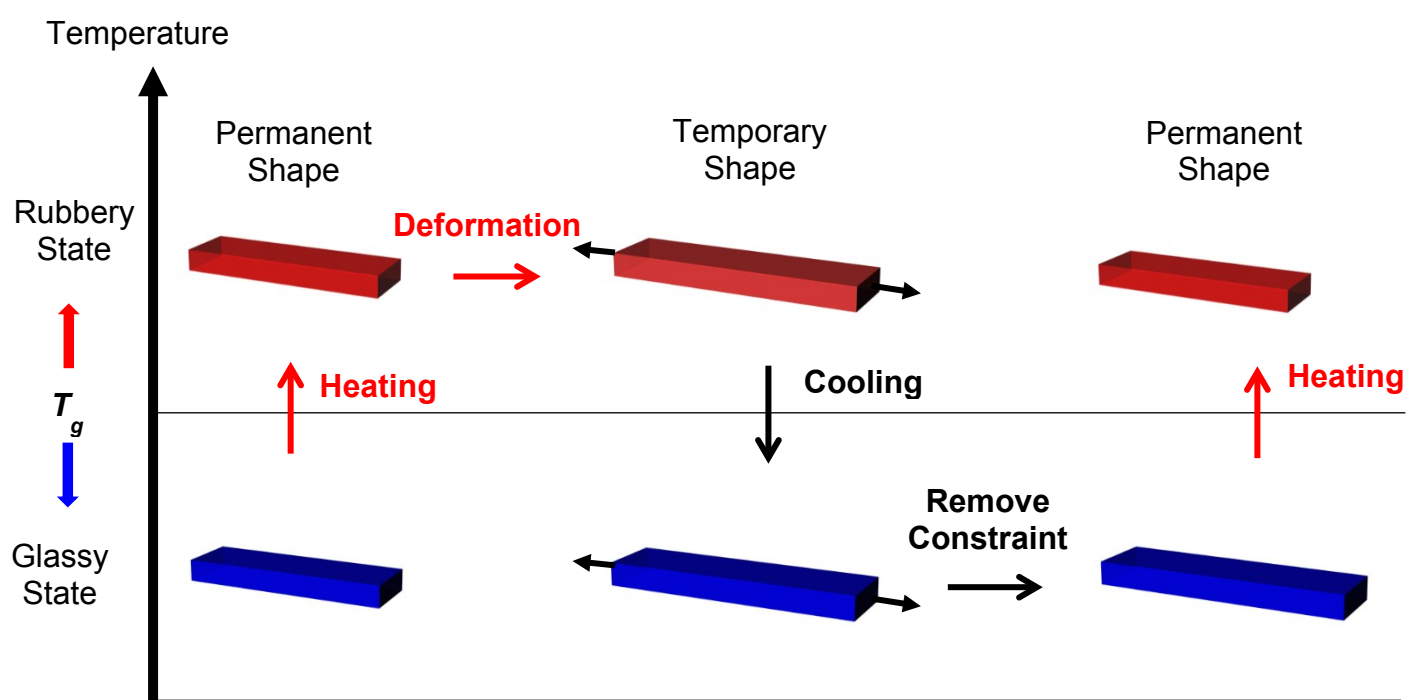

Figure S2 Fabrication of Si ribbons on SOI wafer by photolithography and etching processes.

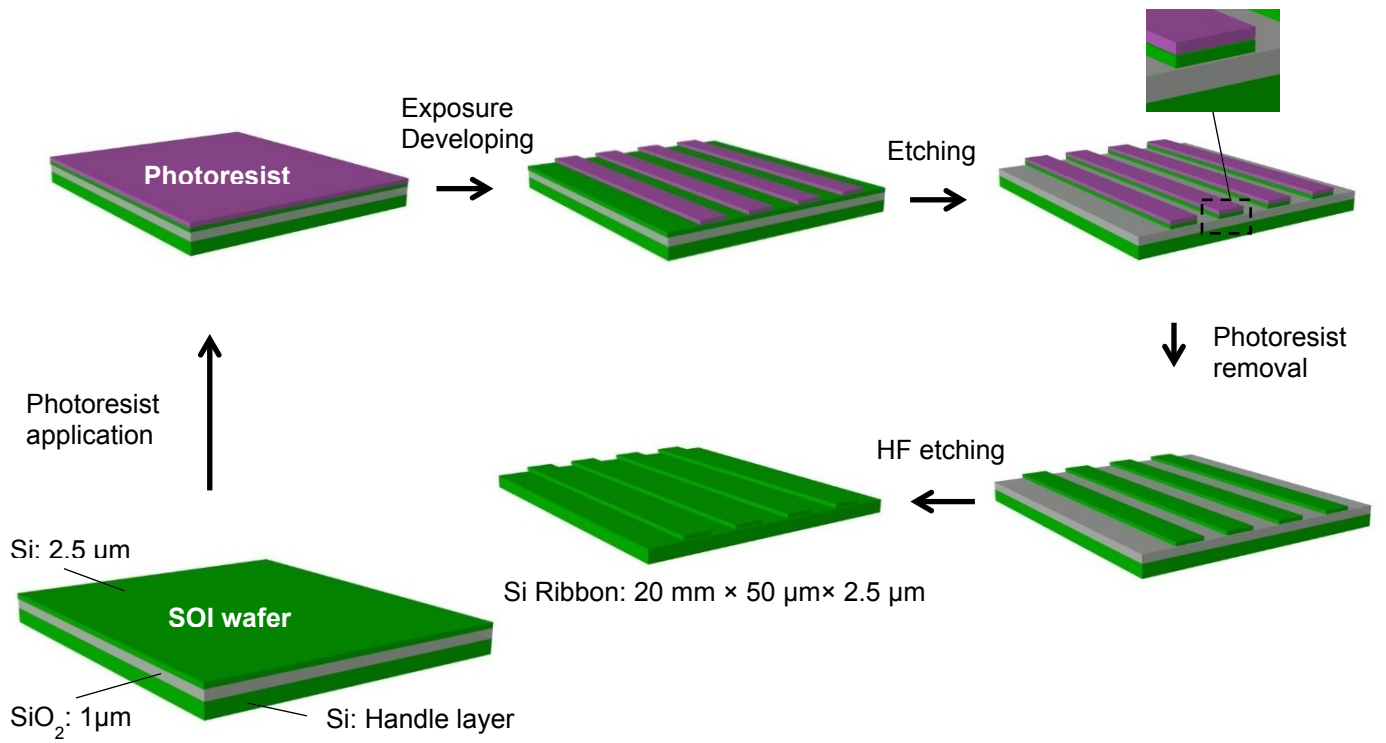

Figure S3 Schematic illustration of stress relaxation in a viscoelastic material due to constant strain.

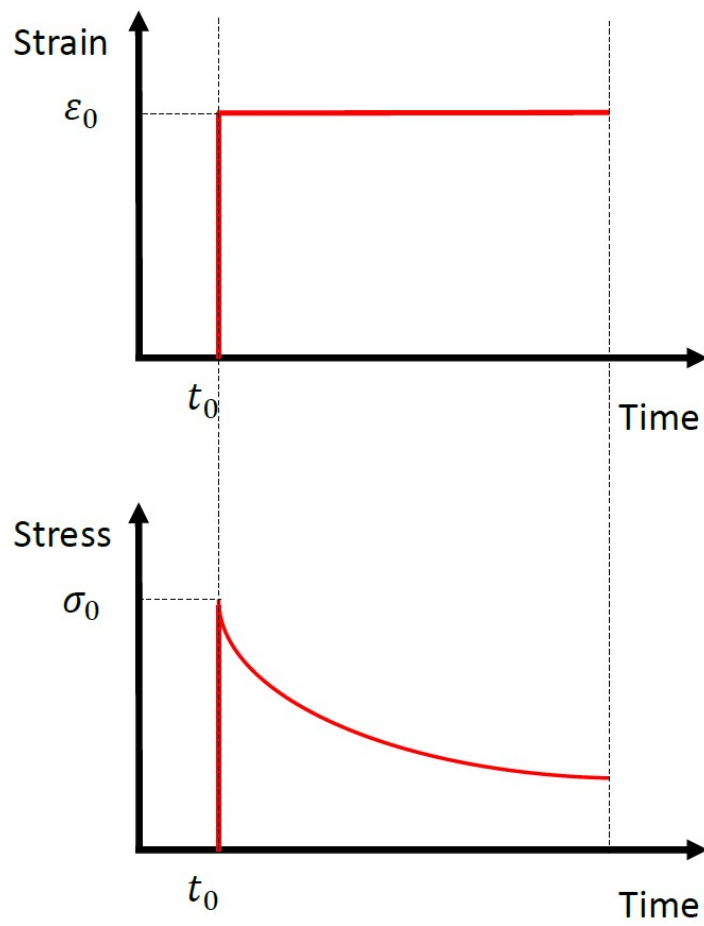

Figure S4 Comparison between experiment and FEA simulation on wrinkle evolution of (a) wavelengths and (b) amplitude at different SMP recovering temperatures.

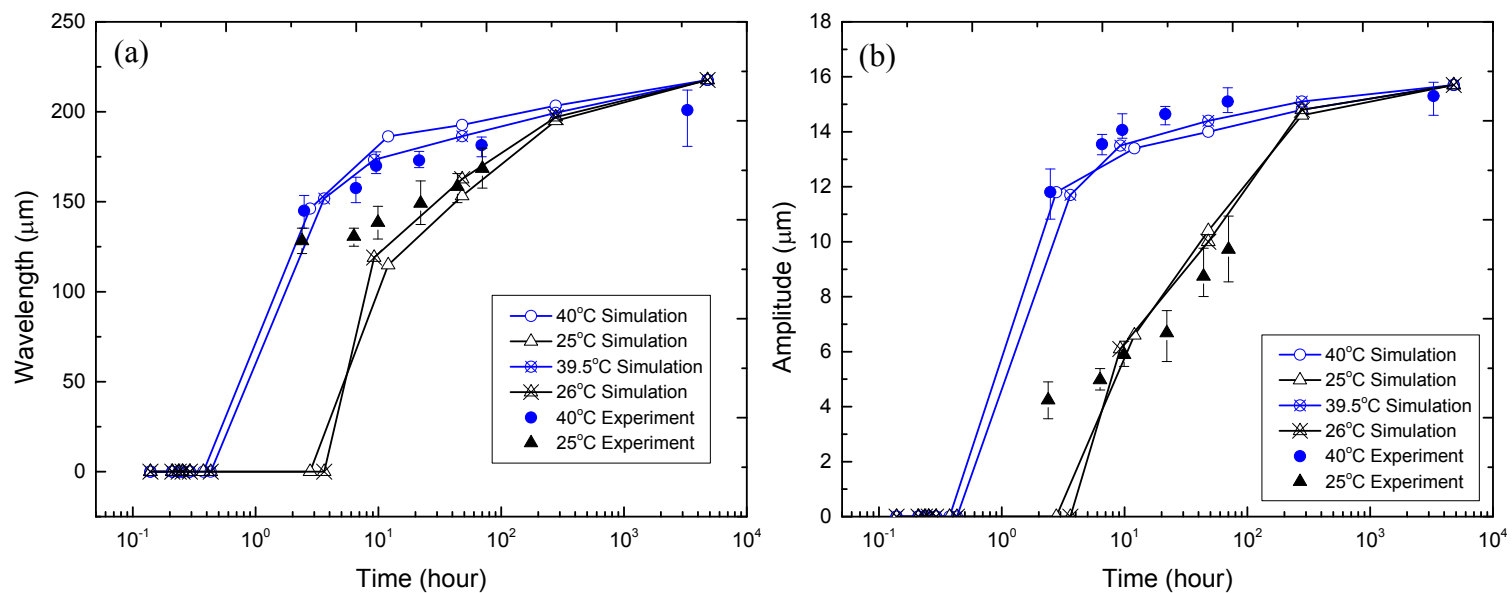

Figure S5. Stress relaxation modulus of the SMP at different temperatures.

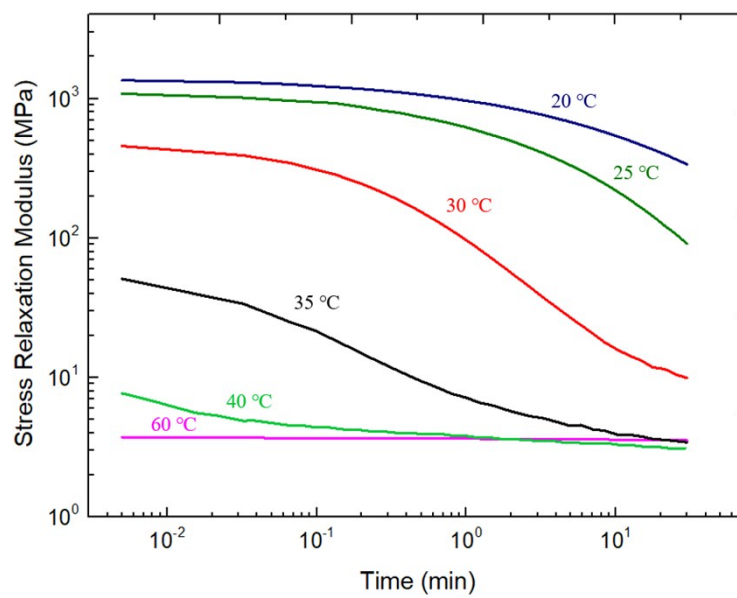

Supplement: c7sm01404j1.pdf [file c7sm01404j1.pdf]
